# Supplementary material for: Comprehensive at-arrival transcriptomic analysis of post-weaned beef cattle uncovers type I interferon and antiviral mechanisms associated with bovine respiratory disease mortality
Source: PubMed Central journal article supplement (PMC8075194; doi:10.1371/journal.pone.0250758), 2021-04-26

Figure 1: Top hits against known bovine virus sequences for S\_33

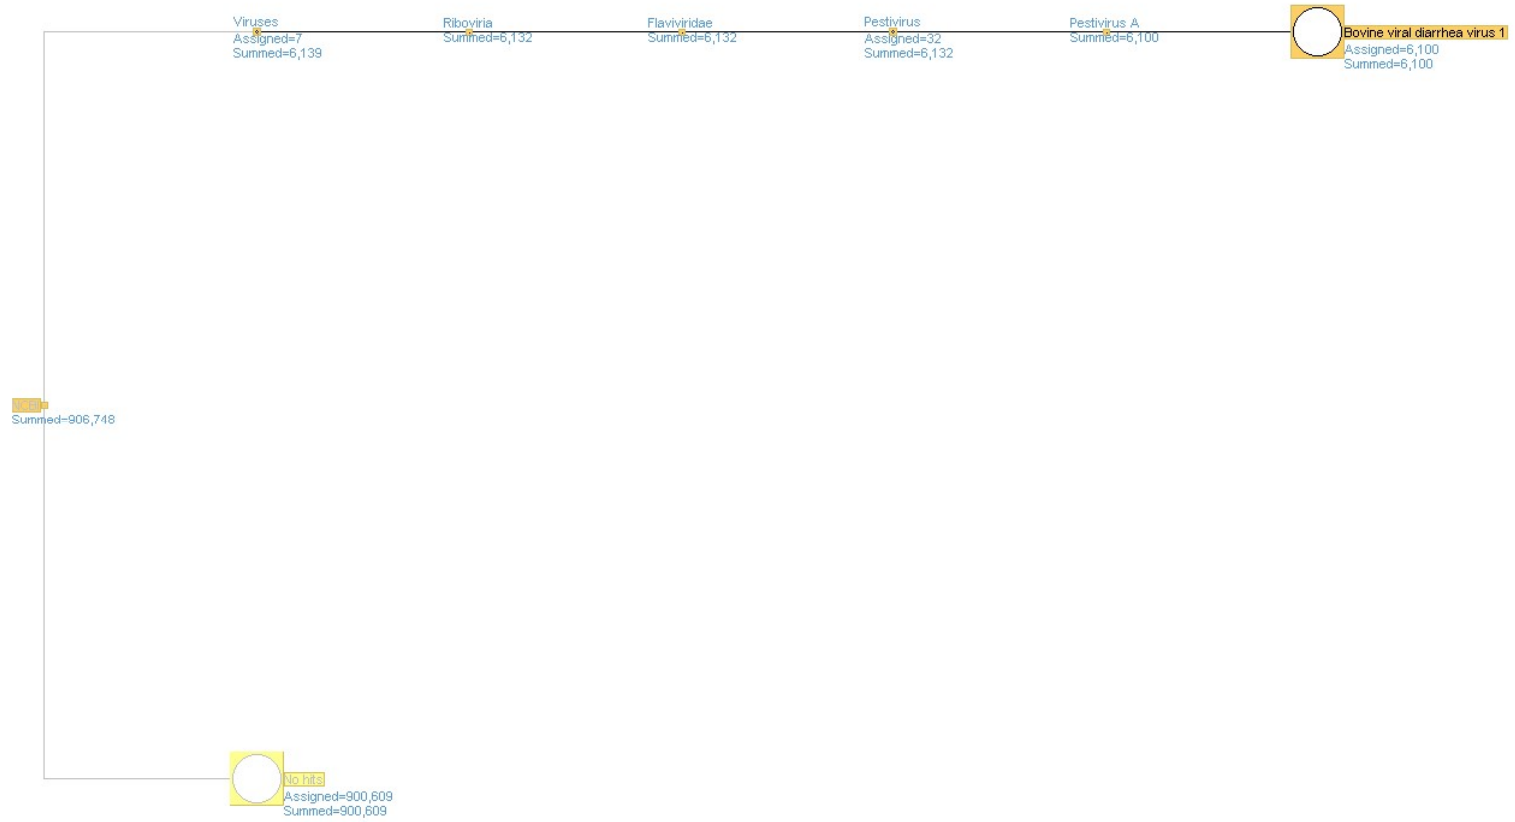

Figure 2: Top hits against known bovine virus sequences for S\_51

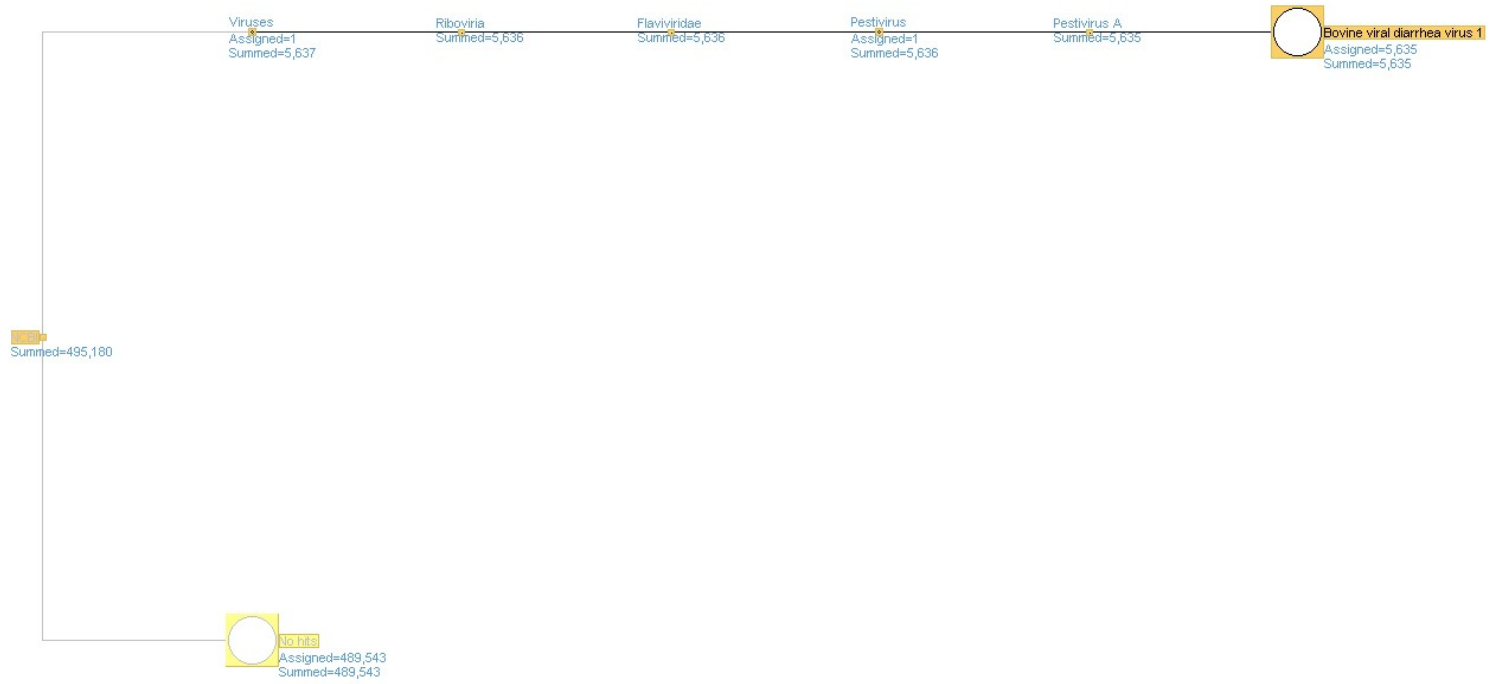

Figure 3: Top hits against known bovine virus sequences for S\_52

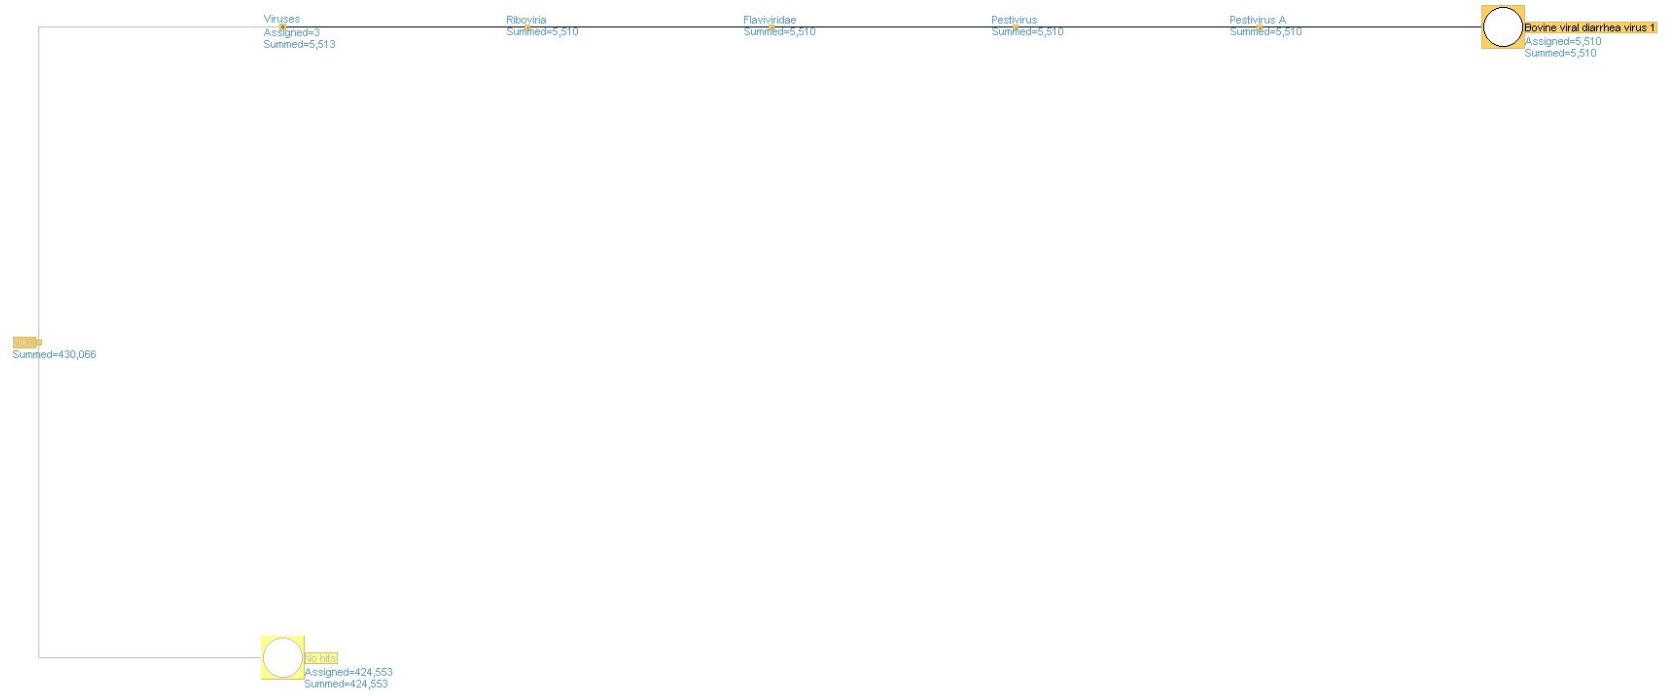

Figure 4: Top hits against known bovine virus sequences for S\_75

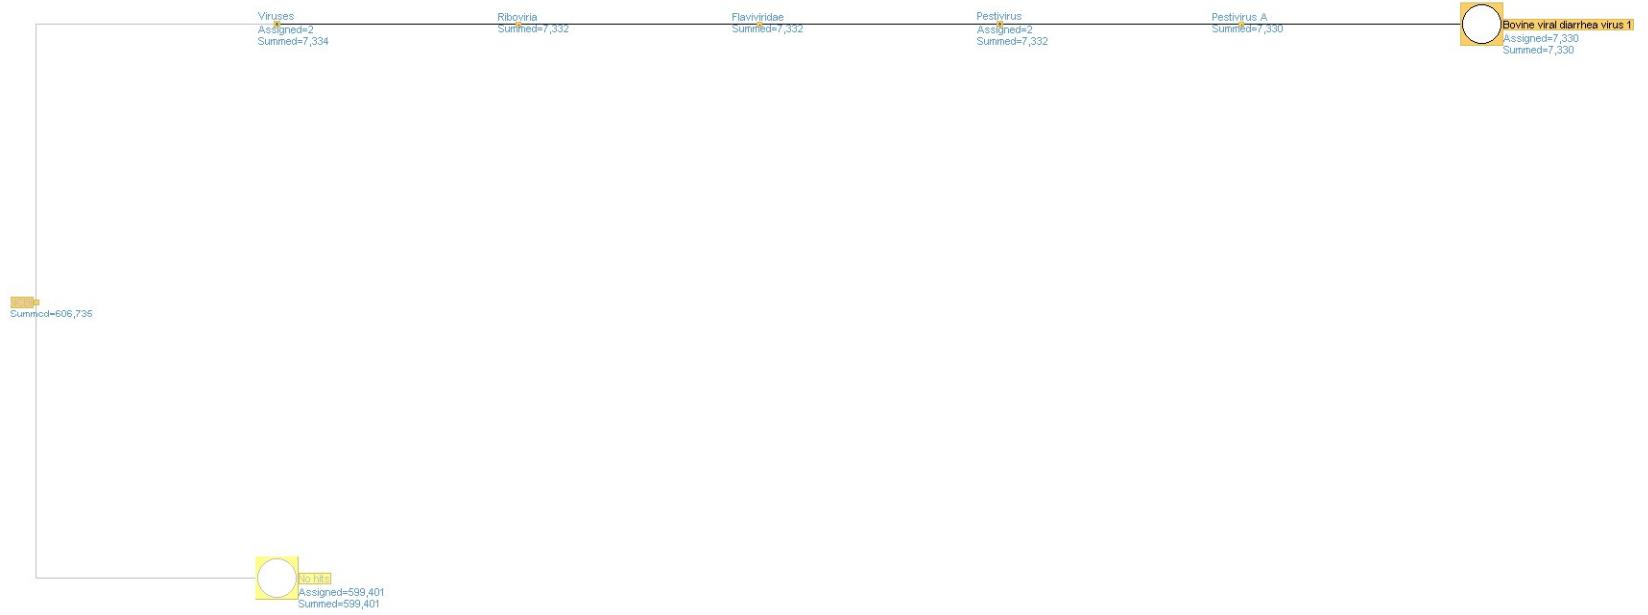

Figure 5: Top hits against known bovine virus sequences for S\_76

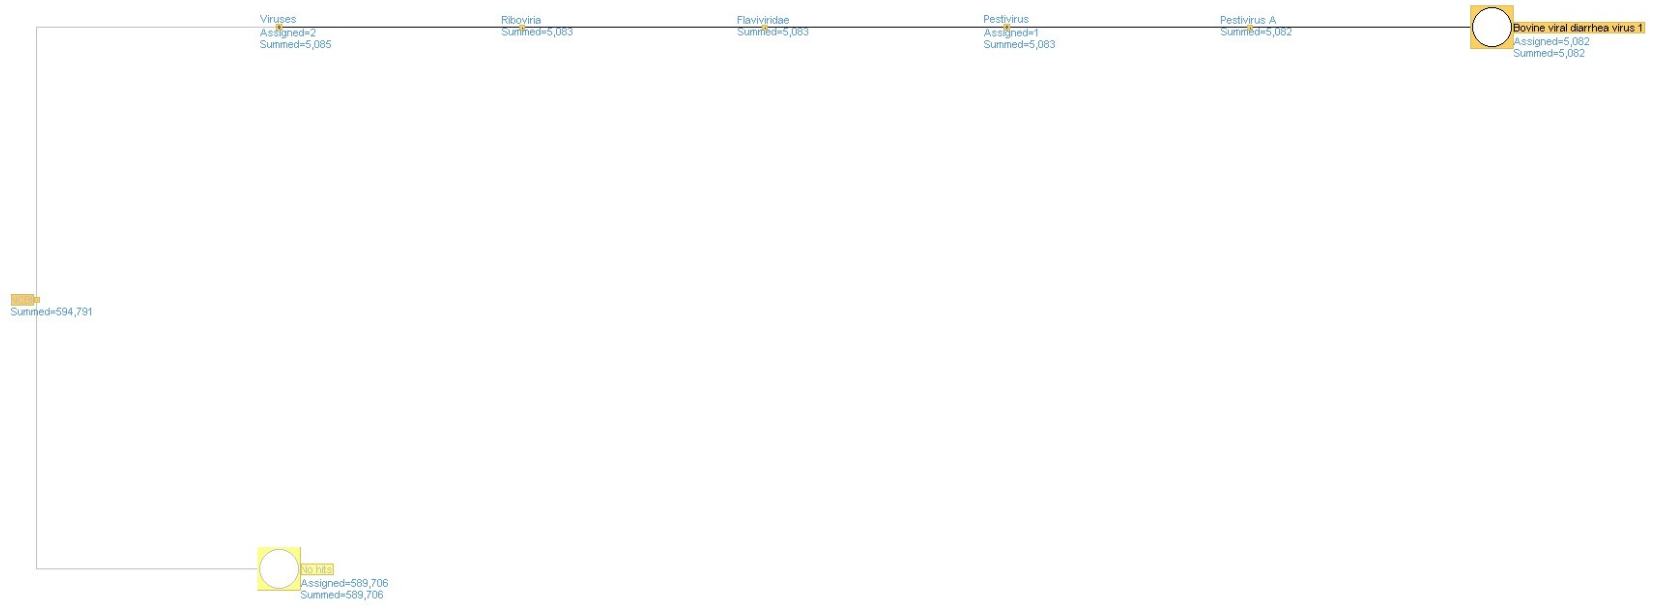

Figure 6: Top hits against known bovine virus sequences for S\_85

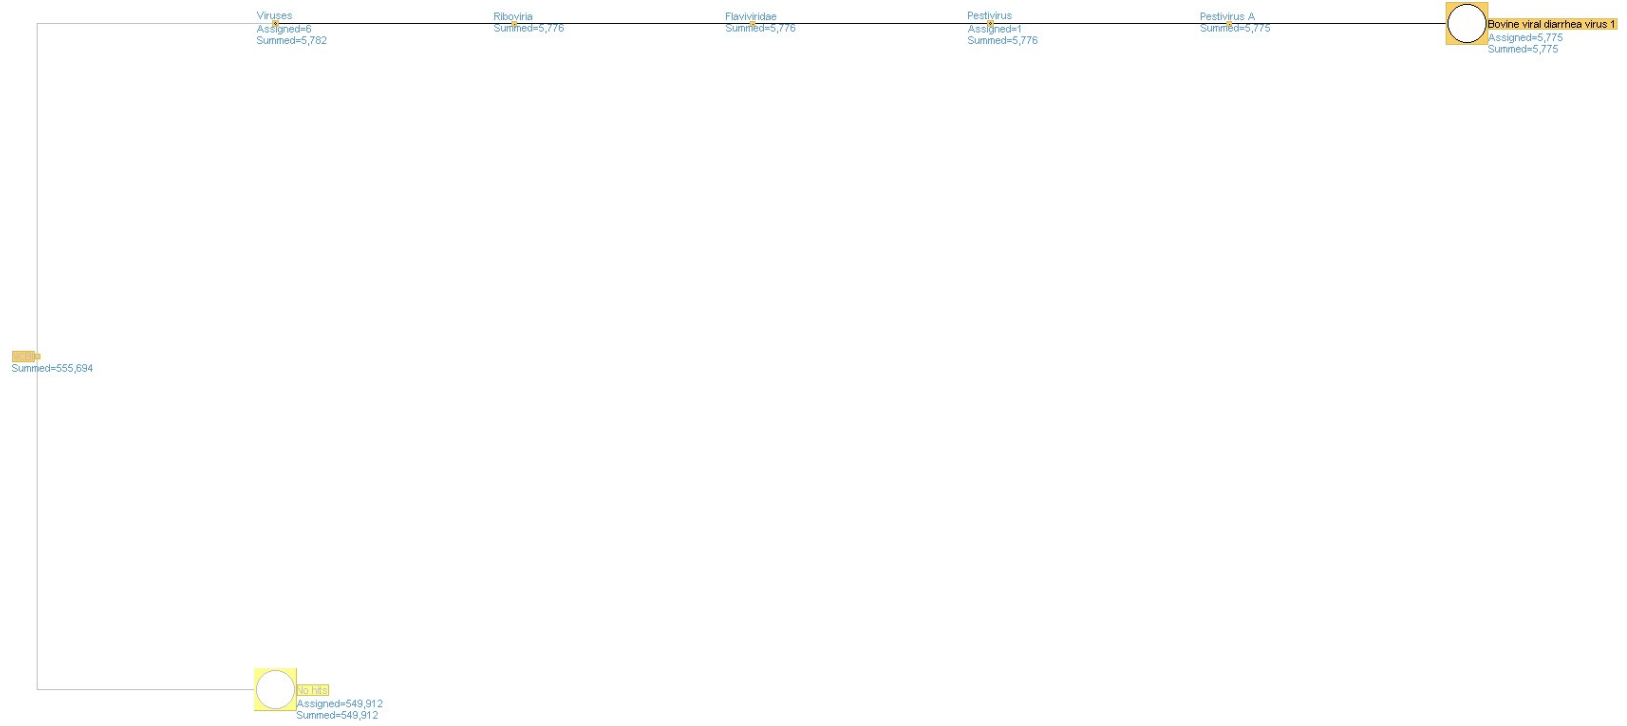

Supplement: pone.0250758.s005.pdf [file pone.0250758.s005.pdf]
